CORRECTION

# Correction: Bees for Development: Brazilian Survey Reveals How to Optimize Stingless Beekeeping

The *PLOS ONE* Staff

## Notice of Republication

This article was republished on May 15, 2015, to correct the legend for Table 1, which was mistakenly incorporated into the body text during the production process. The publisher apologizes for the error. Please download this article again to view the correct version. The originally published, uncorrected article and the republished, corrected article are provided here for reference.

## Supporting Information

**S1 File. Originally published, uncorrected article.**  
(PDF)

**S2 File. Republished, corrected article.**  
(PDF)

## Reference

1. Jaffé R, Pope N, Carvalho AT, Maia UM, Blochtein B, de Carvalho CAL, et al. (2015) Bees for Development: Brazilian Survey Reveals How to Optimize Stingless Beekeeping. *PLoS ONE* 10(3): e0121157. doi: [10.1371/journal.pone.0121157](https://doi.org/10.1371/journal.pone.0121157) PMID: [25826402](https://pubmed.ncbi.nlm.nih.gov/25826402/)

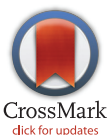

## OPEN ACCESS

**Citation:** The *PLOS ONE* Staff (2015) Correction: Bees for Development: Brazilian Survey Reveals How to Optimize Stingless Beekeeping. *PLoS ONE* 10(6): e0130111. doi:10.1371/journal.pone.0130111

**Published:** June 3, 2015

**Copyright:** © 2015 The PLOS ONE Staff. This is an open access article distributed under the terms of the [Creative Commons Attribution License](https://creativecommons.org/licenses/by/4.0/), which permits unrestricted use, distribution, and reproduction in any medium, provided the original author and source are credited.
